# Supplementary material for: Protein Synthesis Inhibition Activity by Strawberry Tissue Protein Extracts during Plant Life Cycle and under Biotic and Abiotic Stresses
Source: Int J Mol Sci. 2013 Jul 25;14(8):15532–45. doi: 10.3390/ijms140815532 (PMC3759871; doi:10.3390/ijms140815532)
Supplement: Supplementary file 1 [file ijms-14-15532-s001.pdf]

## Supplementary Information

**Table S1.** IC<sub>50</sub> used for the calculation of the activities reported in Figures 3 and 4.

| IC <sub>50</sub> (µg/mL) <sup>a</sup> |          |              |       |              |       |
|---------------------------------------|----------|--------------|-------|--------------|-------|
| Growth stages                         | Tissues  | Dora         |       | Record       |       |
|                                       |          | Organic soil | IPM   | Organic soil | IPM   |
| Quiescence                            | leaves   | 17.5         | 16.2  | 10.4         | 12.9  |
|                                       | roots    | 19.6         | 25.0  | 19.6         | 19.6  |
|                                       | rhizomes | 51.0         | 54.6  | 56.2         | 69.8  |
|                                       | buds     | 21.6         | 12.7  | 21.5         | 13.0  |
| Flowering                             | leaves   | 11.0         | 22.0  | 19.4         | 23.3  |
|                                       | roots    | 40.1         | 46.8  | 34.2         | 26.9  |
|                                       | rhizomes | 72.9         | 78.2  | 63.8         | 60.4  |
|                                       | buds     | 23.3         | 26.9  | 16.8         | 16.6  |
|                                       | flowers  | 39.7         | 31.9  | 28.0         | 33.2  |
| Fructification                        | leaves   | 39.3         | 38.6  | 29.1         | 33.9  |
|                                       | roots    | 47.1         | 43.2  | 35.3         | 51.3  |
|                                       | rhizomes | 97.5         | 139.6 | 148.8        | 147.0 |
|                                       | fruits   | 41.8         | 50.6  | 37.8         | 35.7  |

<sup>a</sup> The IC<sub>50</sub> values reported in tables are the mean of duplicate experiments for each tissue × 4 individual plants.

**Table S2.** IC<sub>50</sub> used for the calculation of the activities reported in Figure 5.

| IC <sub>50</sub> (µg/mL) <sup>a</sup> |     |        |         |        |         |
|---------------------------------------|-----|--------|---------|--------|---------|
|                                       | Day | Dora   |         | Record |         |
|                                       |     | Normal | Drought | Normal | Drought |
|                                       | 0   | 11.4   | 31.5    | 40.3   | 37.5    |
|                                       | 6   | 32.7   | 35.8    | 58.6   | 47.9    |
|                                       | 12  | 58.1   | 27.8    | 49.8   | 42.2    |
|                                       | 18  | 47.7   | 62.0    | 95.5   | 42.6    |
|                                       | 24  | 44.2   | 50.2    | 98.8   | 58.2    |

<sup>a</sup> The IC<sub>50</sub> values reported in tables are the mean of duplicate experiments for each tissue × 4 individual plants.
